# Supplementary material for: The Bulk of Autotaxin Activity Is Dispensable for Adult Mouse Life
Source: PubMed Central journal article supplement (PMC4646642; doi:10.1371/journal.pone.0143083), 2015-11-16
Supplement: pone.0143083.s001.pdf [file pone.0143083.s001.pdf]

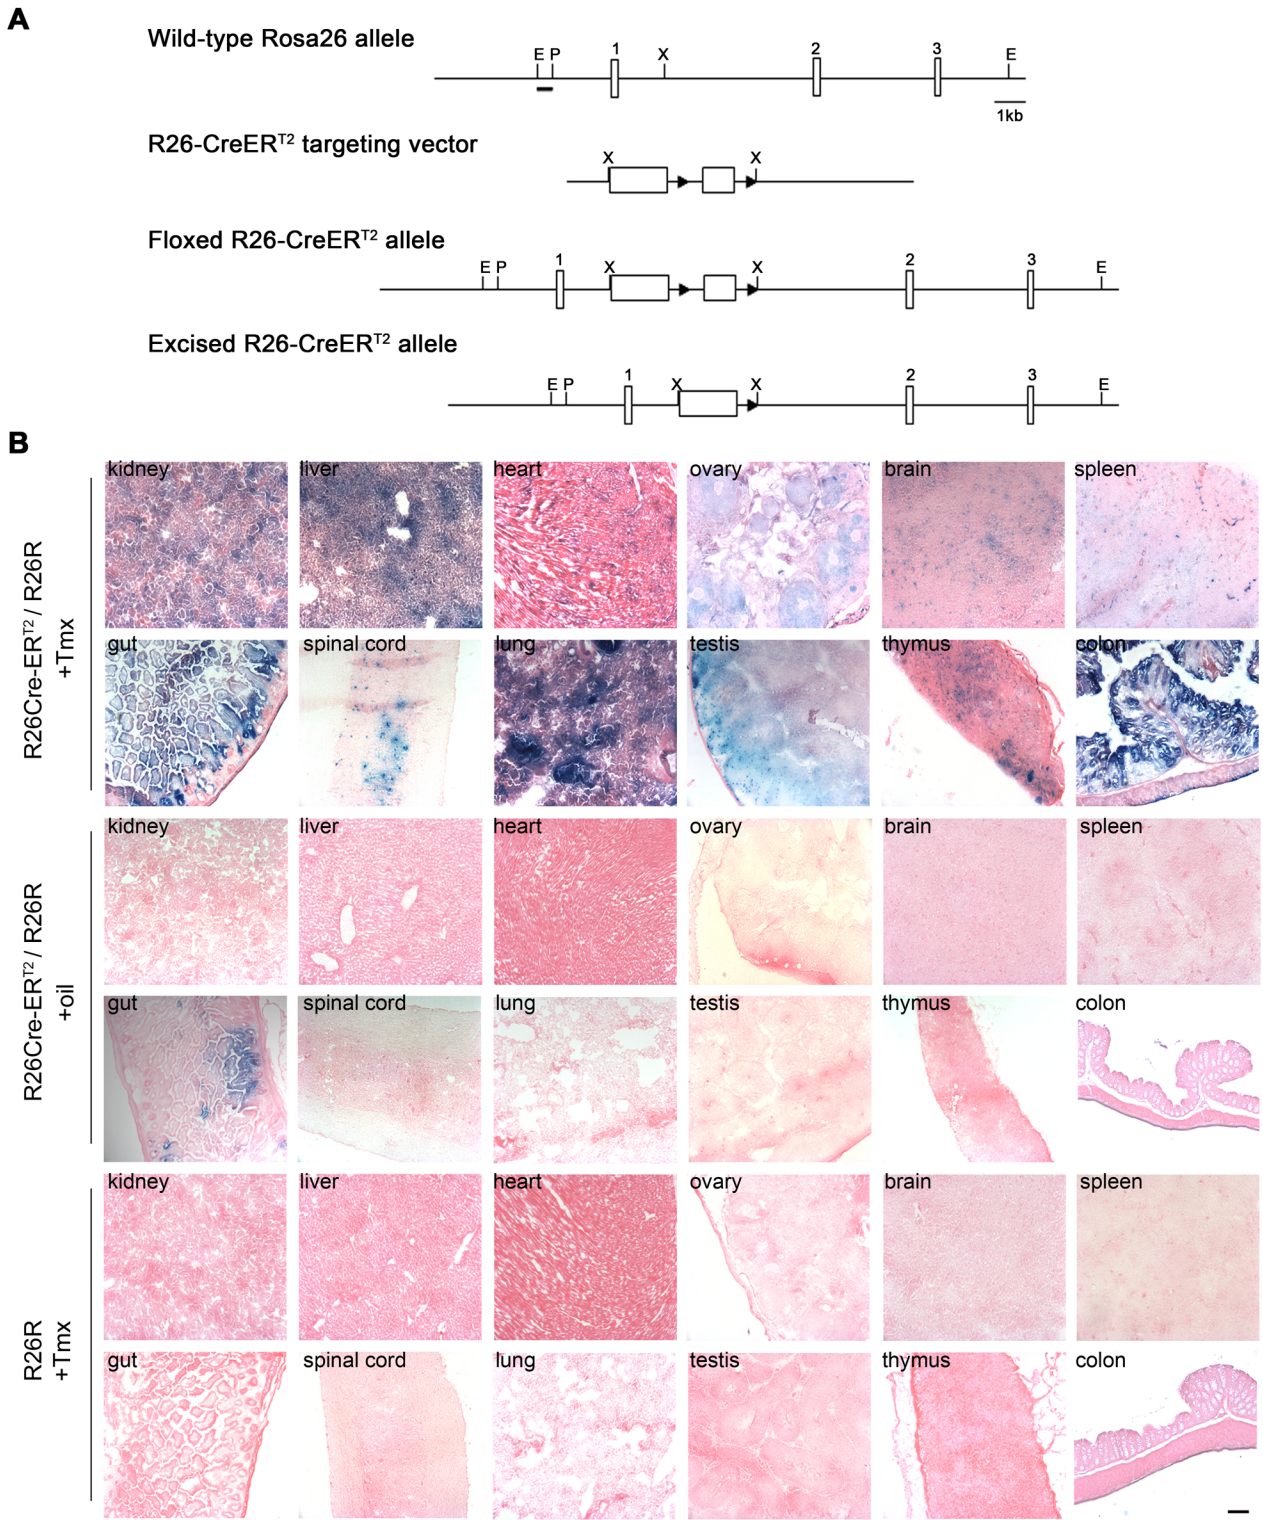

**S1 Fig. Widespread sporadic Cre excision in tamoxifen-treated R26CreER<sup>T2</sup>/ROSAlacZ mice. A.** Schematic representation of the gene targeting strategy. The R26Cre-ER<sup>T2</sup> construct was sequentially inserted into the Rosa26 locus by homologous recombination as depicted. E, EcoRI; P, PacI; CreER<sup>T2</sup>, adenovirus splice acceptor-CreER<sup>T2</sup>-PMC polyadenylation site; H, Hygro, PGK-hygromycin. **B.** Tissue sections from 8-week old double transgenic R26Cre-ER<sup>T2</sup>/R26R mice and littermates were stained for b-galactosidase activity to identify sites of active Cre-mediated recombination (Scale bar: 150  $\mu$ m).
