# Supplementary material for: The Bulk of Autotaxin Activity Is Dispensable for Adult Mouse Life
Source: PubMed Central journal article supplement (PMC4646642; doi:10.1371/journal.pone.0143083), 2015-11-16
Supplement: pone.0143083.s002.pdf [file pone.0143083.s002.pdf]

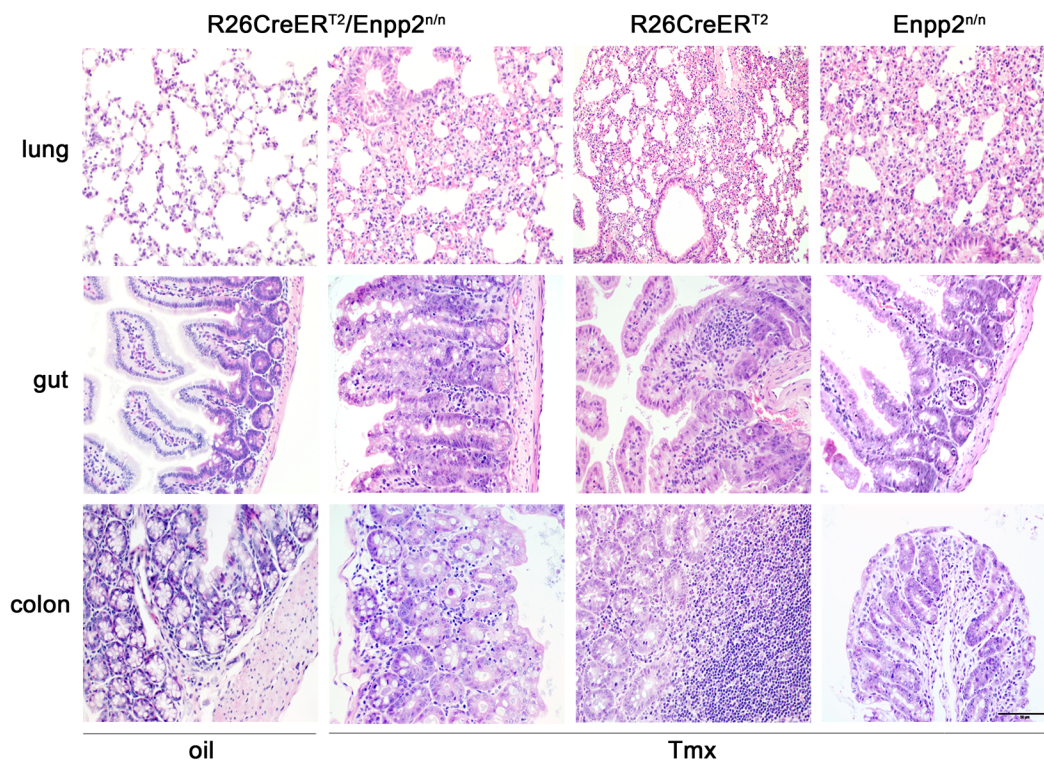

**S2 Fig. *In vivo* Tmx treatment results in minor inflammatory changes in lung and gastrointestinal (GI) tract.** Representative images of tissue sections (H&E staining) from R26Cre-ER<sup>T2</sup>/Enpp2<sup>n/n</sup> mice and littermates treated IP with Tmx (100 mg/kg) or corn oil once per day for 10 days. Mice were sacrificed 2 days post Tmx treatment. (Scale bar: 50  $\mu$ m). Mice treated with corn oil had no histopathological changes indicating that the inflammatory changes were due to Tmx administration.
