# Supplementary material for: The Bulk of Autotaxin Activity Is Dispensable for Adult Mouse Life
Source: PubMed Central journal article supplement (PMC4646642; doi:10.1371/journal.pone.0143083), 2015-11-16
Supplement: pone.0143083.s003.pdf [file pone.0143083.s003.pdf]

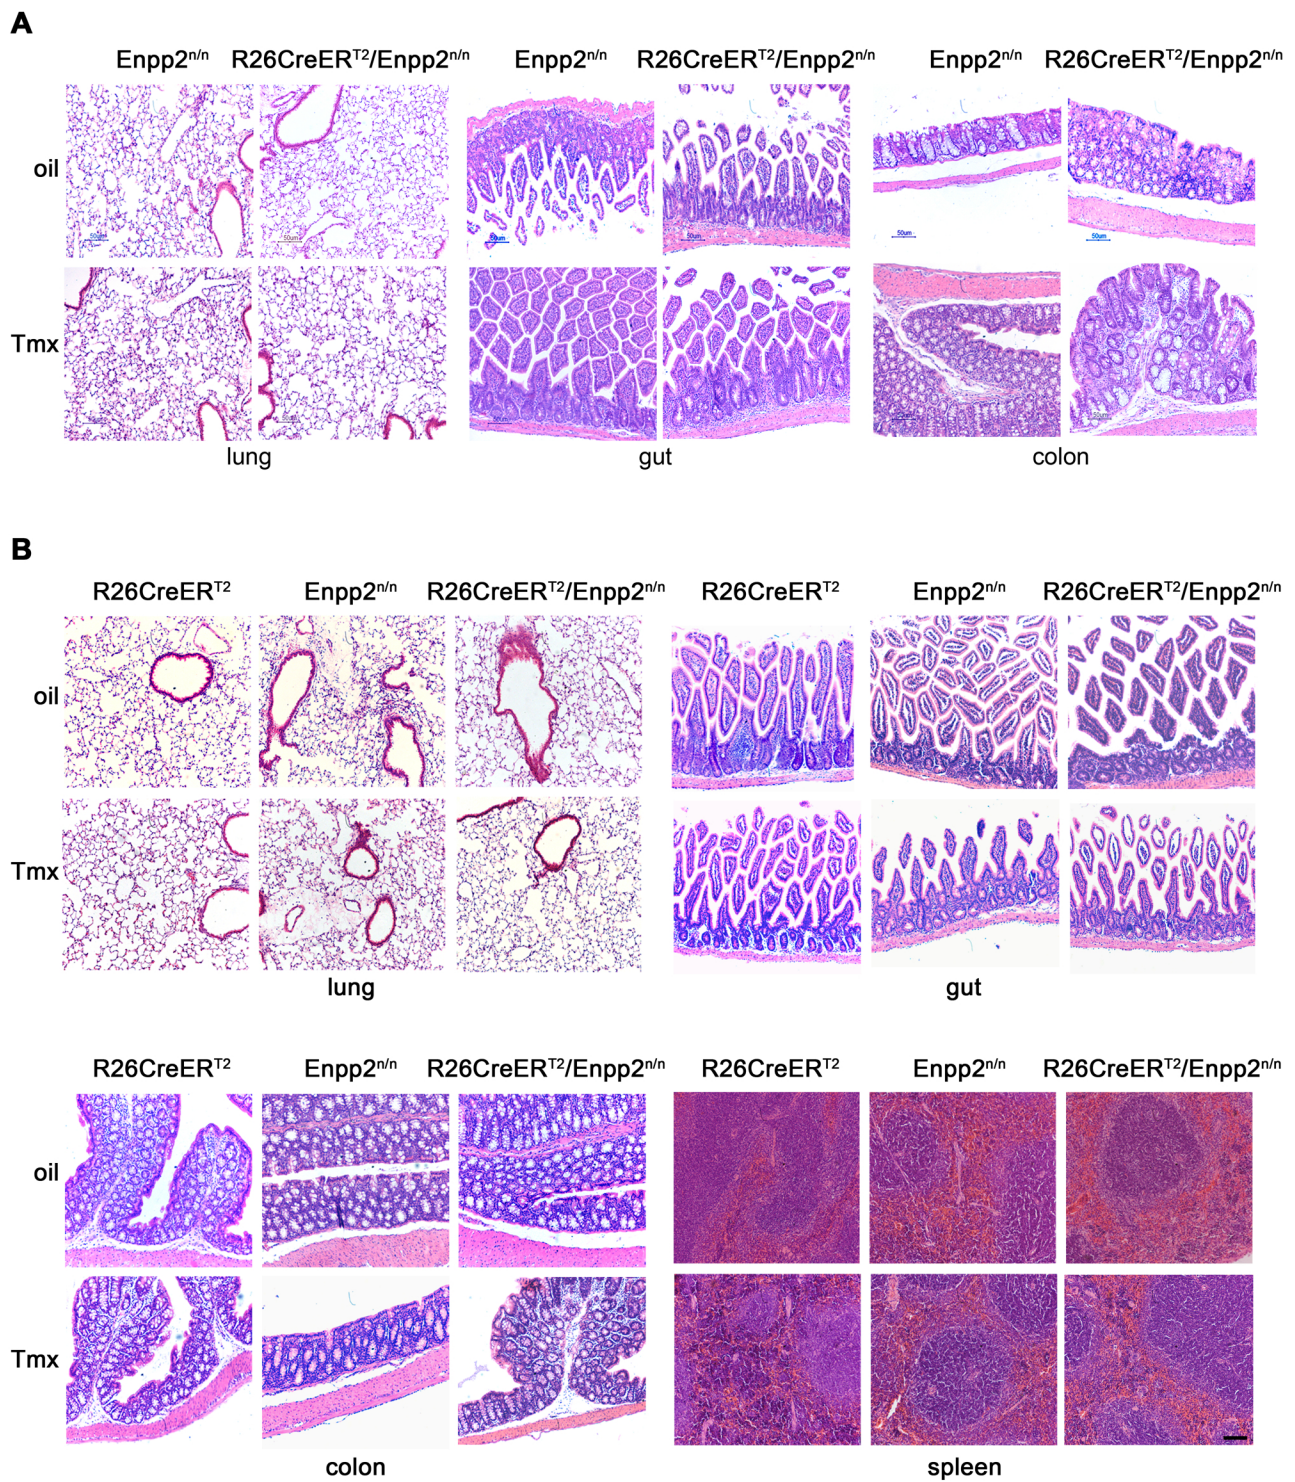

**S3 Fig. Genetic ablation of *Enpp2* has no effect in tissue histology.** Representative images of tissue sections (H&E staining) from R26Cre-ER<sup>T2</sup>/Enpp2<sup>n/n</sup> mice and littermates treated IP with Tmx (100 mg/kg) or corn oil for **A**. 10 days and **B**. 5 days. Mice were sacrificed 20 or 10 and 20 days post Tmx treatment, respectively. (Scale bar: 150  $\mu$ m).
