# Supplementary material for: The Bulk of Autotaxin Activity Is Dispensable for Adult Mouse Life
Source: PubMed Central journal article supplement (PMC4646642; doi:10.1371/journal.pone.0143083), 2015-11-16
Supplement: pone.0143083.s004.pdf [file pone.0143083.s004.pdf]

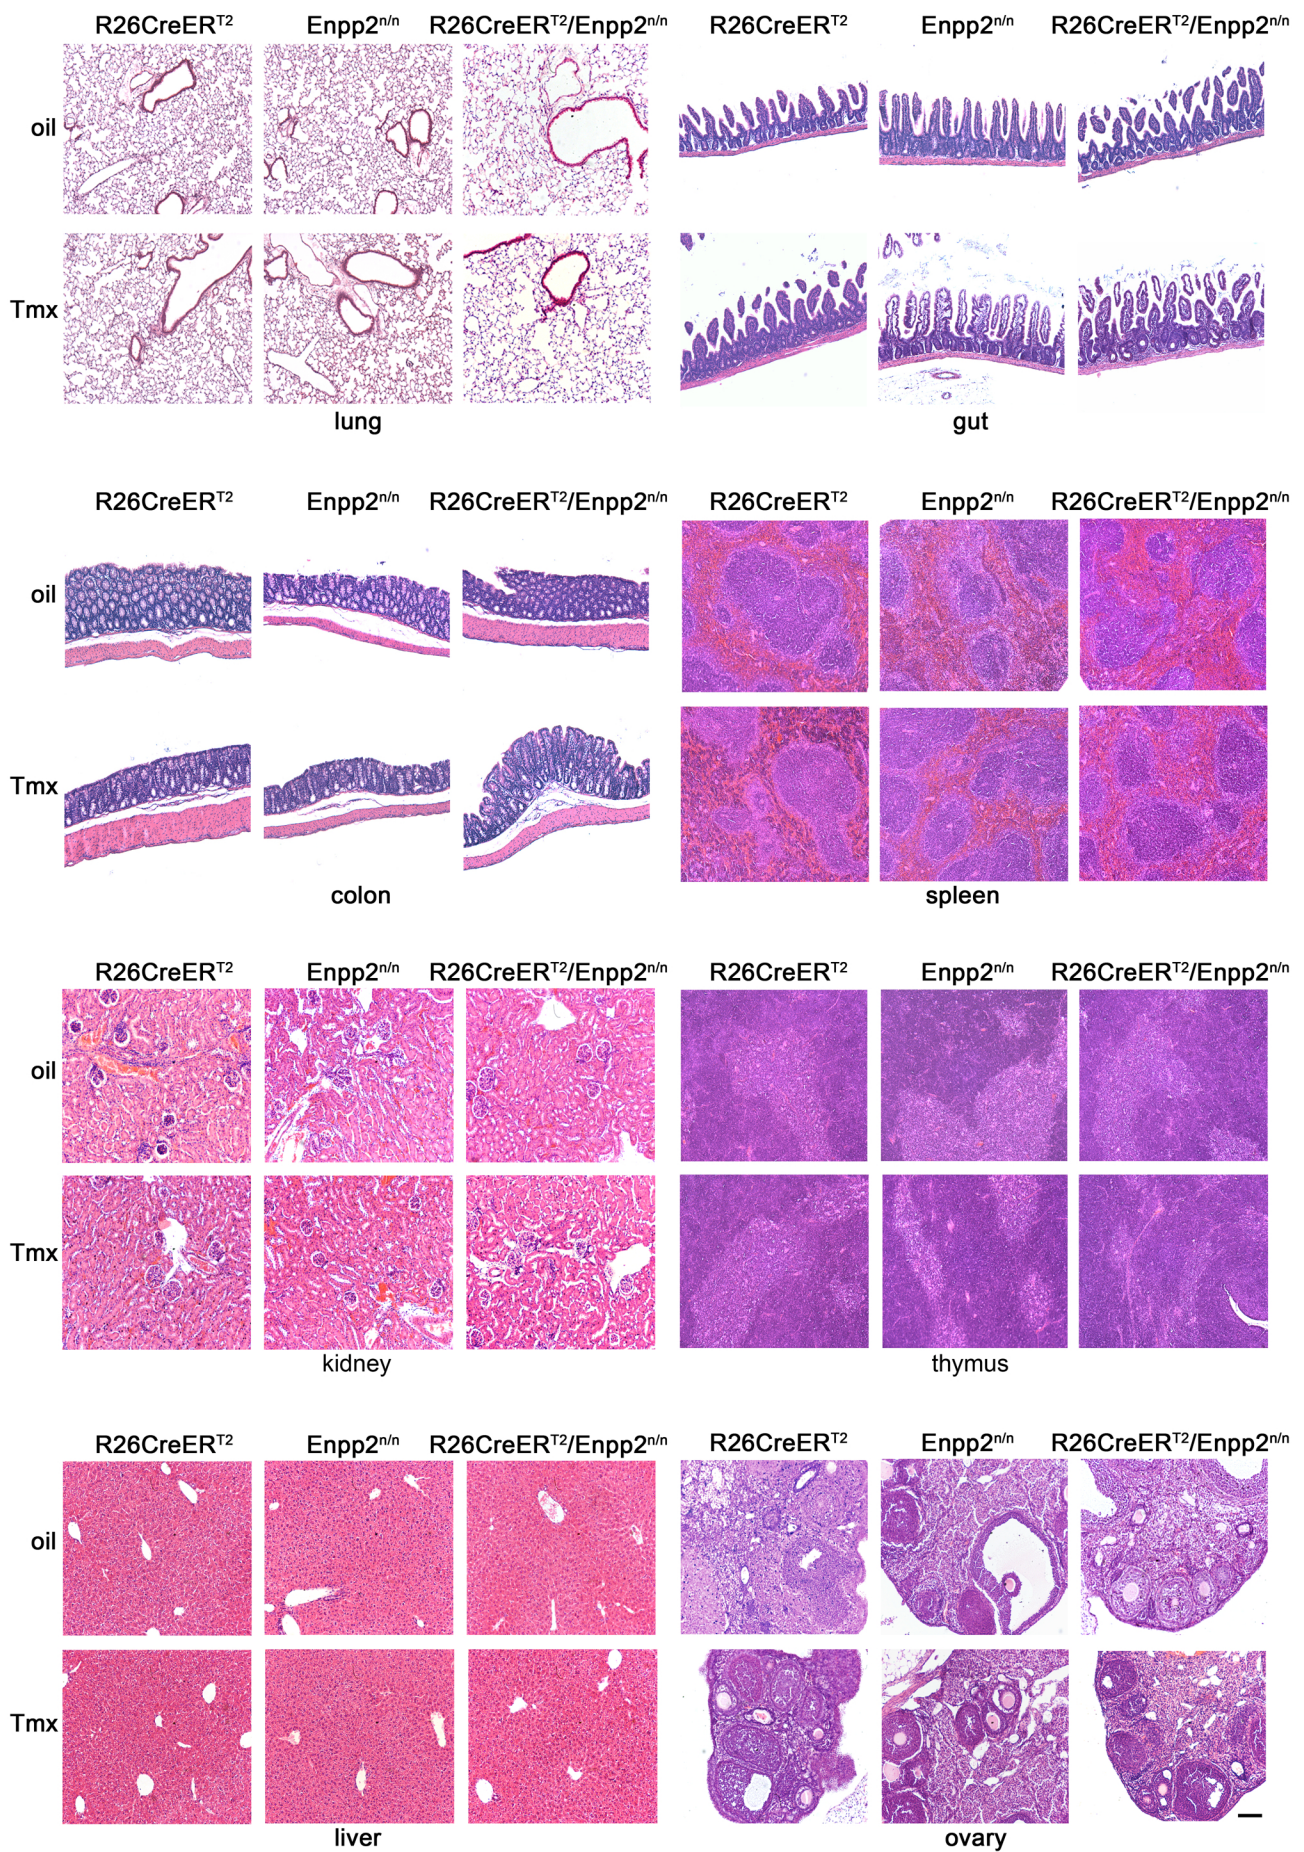

**S4 Fig. Genetic deletion of *Enpp2* has no effect in tissue histology.** Representative images of tissue sections (H&E staining) from R26Cre-ER<sup>T2</sup>/Enpp2<sup>n/n</sup> mice and littermates treated PO with Tmx (180 mg/kg) or corn oil for 6 days. Mice were sacrificed 18 and 30 days post Tmx administration. (Scale bar: 150  $\mu$ m).
