# Supplementary material for: The Bulk of Autotaxin Activity Is Dispensable for Adult Mouse Life
Source: PubMed Central journal article supplement (PMC4646642; doi:10.1371/journal.pone.0143083), 2015-11-16
Supplement: pone.0143083.s006.pdf [file pone.0143083.s006.pdf]

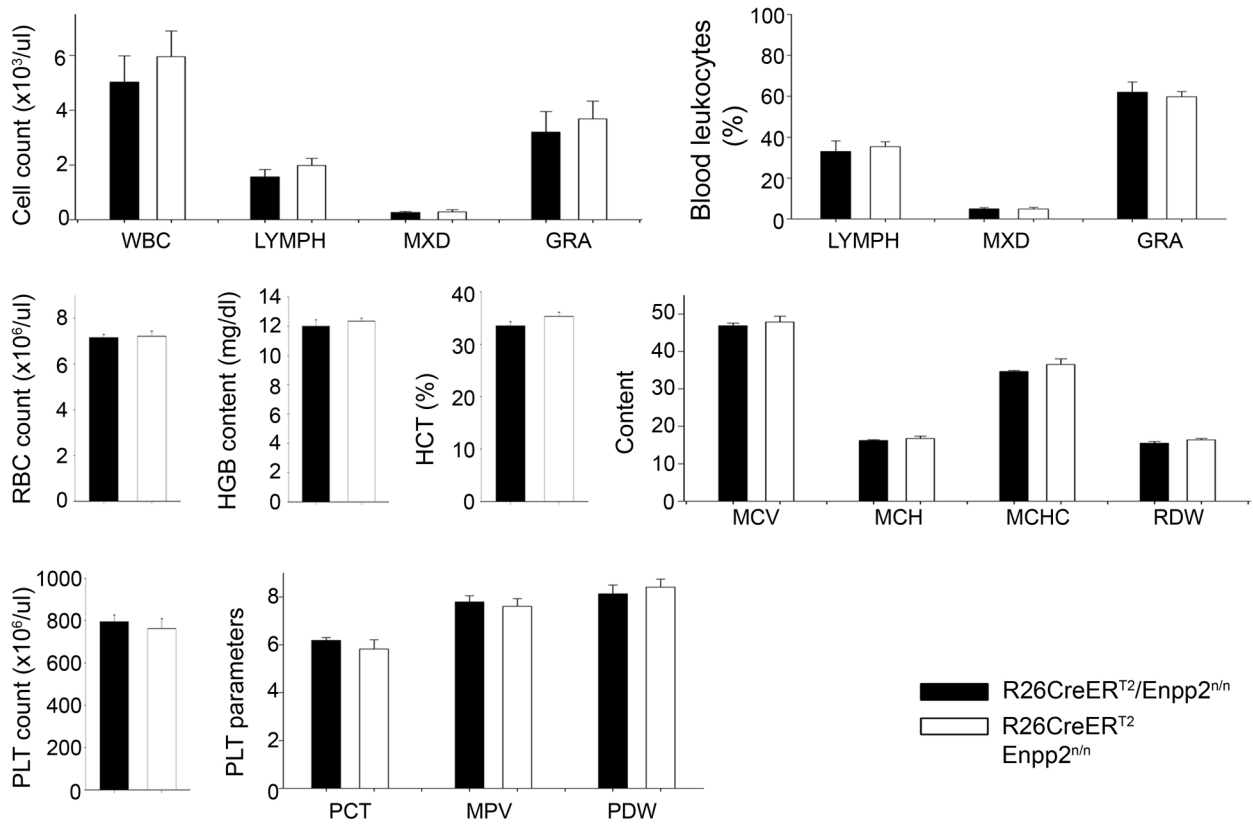

**S6 Fig. Genetic excision of *Enpp2* has no effect in hematopoietic cell populations.** Blood cell counts and parameters in Tmx-treated R26Cre-ER<sup>T2</sup>/Enpp2<sup>n/n</sup> mice and littermates (n=3-6, exp=1). WBC: White blood cells; LYMPH: Lymphocytes; MXD: monocytes, basophils and eosinophils; GRA: Granulocytes; RBC: Red blood cells; HGB: hemoglobin; HCT: hematocrit; MCV: mean volume of erythrocytes; MCH: mean content of hemoglobin; MCHC: mean concentration of hemoglobin; RDW: Red cell Distribution Width; PLT: platelets; PCT: plateletcrit; MPV: mean platelet volume; PDW: relative width of the platelet distribution.
