# Supplementary material for: The Bulk of Autotaxin Activity Is Dispensable for Adult Mouse Life
Source: PubMed Central journal article supplement (PMC4646642; doi:10.1371/journal.pone.0143083), 2015-11-16
Supplement: pone.0143083.s007.pdf [file pone.0143083.s007.pdf]

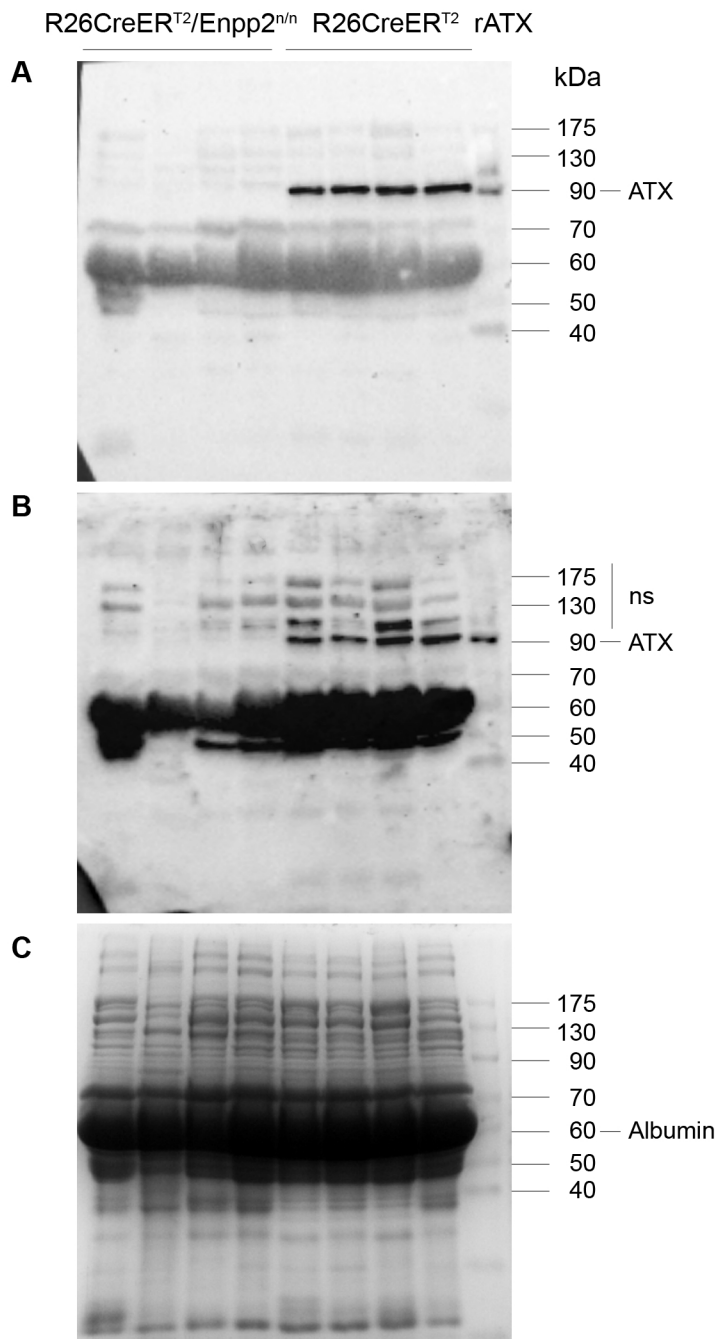

**S7 Fig. Genetic excision of *Enpp2* attenuates its protein levels in the plasma.** **A.** Western blot of the indicated mouse plasma samples with a rat monoclonal antibody (4F1) against ATX. **B.** Western blot of the same (as in A) samples with a commercial (Cayman) rabbit polyclonal antibody against ATX. **C.** Coomassie brilliant blue staining of the same (as in A) samples, serving as a loading control.
