# Supplementary material for: The Bulk of Autotaxin Activity Is Dispensable for Adult Mouse Life
Source: PubMed Central journal article supplement (PMC4646642; doi:10.1371/journal.pone.0143083), 2015-11-16
Supplement: pone.0143083.s008.pdf [file pone.0143083.s008.pdf]

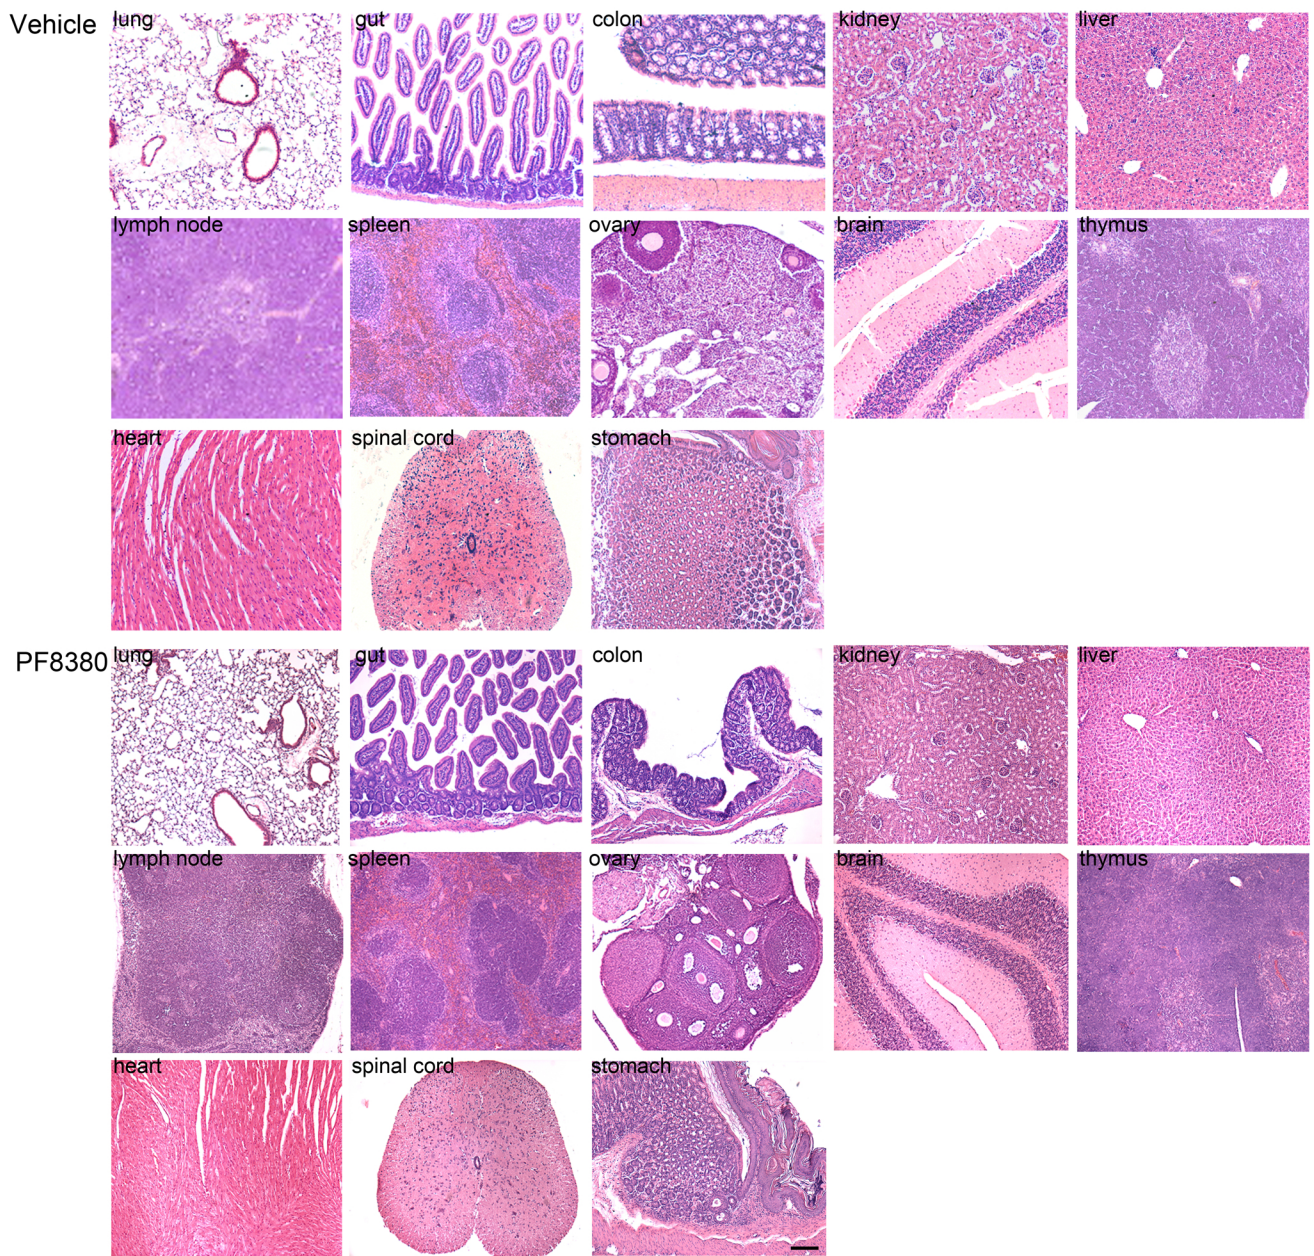

**S8 Fig. Potent pharmacological inhibition of ATX has no effect on tissue histology.** Representative images of tissue sections from vehicle-treated and PF8380-treated mice (120 mg/kg PF8380, PO, twice a day for 3 weeks), stained with H&E. (Scale bar: 150  $\mu$ m).
