# Supplementary material for: The Bulk of Autotaxin Activity Is Dispensable for Adult Mouse Life
Source: PubMed Central journal article supplement (PMC4646642; doi:10.1371/journal.pone.0143083), 2015-11-16
Supplement: pone.0143083.s009.pdf [file pone.0143083.s009.pdf]

**S1 Table. R26CreER<sup>T2</sup>-driven *Enpp2* recombination, as tested by PCR, in the indicated mouse strains and upon the indicated treatments**

|                                 | <b>Genotype</b>  | ATXiCre | ATXiCre | ATXiCre | ATX   | ATX   | ATXiCre | ATXiCre | ATX   | ATX   | iCre  | iCre  |
|---------------------------------|------------------|---------|---------|---------|-------|-------|---------|---------|-------|-------|-------|-------|
|                                 | <b>Treatment</b> | Tmx     | Tmx     | Oil     | Tmx   | Oil   | Tmx     | Oil     | Tmx   | Oil   | Tmx   | Oil   |
|                                 | <b>mg/Kg</b>     | 50      | 100     | -       | 100   | -     | 100     | -       | 100   | -     | 100   | -     |
|                                 | <b>Route</b>     | IP      | IP      | IP      | IP    | IP    | IP      | IP      | IP    | IP    | IP    | IP    |
|                                 | <b>Days</b>      | 10      | 10      | 10      | 10    | 10    | 5       | 5       | 5     | 5     | 5     | 5     |
| <b>Recombination in tissues</b> | Brain            | - 1/1   | + 1/1   | nd      | nd    | nd    | + 4/4   | + 1/1   | - 3/3 | - 1/1 | - 2/2 | - 2/2 |
|                                 | Heart            | - 1/1   | + 1/1   | nd      | nd    | nd    | + 2/2   | + 1/2   | - 3/3 | - 1/1 | - 2/2 | - 2/2 |
|                                 | Lung             | - 1/1   | + 6/6   | + 2/2   | - 4/4 | - 2/2 | + 8/8   | + 4/5   | - 6/6 | - 4/4 | - 6/6 | - 5/5 |
|                                 | Gut              | -1/1    | + 6/6   | + 2/2   | - 4/4 | - 2/2 | + 11/11 | + 7/7   | - 6/6 | - 4/4 | - 6/6 | - 5/5 |
|                                 | Spleen           | - 1/1   | + 6/6   | + 2/2   | - 4/4 | - 2/2 | + 11/11 | + 7/7   | - 6/6 | - 4/4 | - 6/6 | - 5/5 |
|                                 | Thymus           | - 1/1   | + 1/1   | nd      | nd    | nd    | + 4/4   | + 2/2   | - 3/3 | - 1/1 | - 2/2 | - 2/2 |
|                                 | Spinal cord      | - 1/1   | + 1/1   | nd      | nd    | nd    | + 3/3   | + 2/2   | -3/3  | - 1/1 | - 2/2 | - 2/2 |
|                                 | Kidney           | - 1/1   | + 1/1   | nd      | nd    | nd    | + 4/4   | + 1/1   | - 3/3 | - 1/1 | - 2/2 | - 2/2 |
|                                 | Liver            | - 1/1   | + 1/1   | nd      | nd    | nd    | + 4/4   | + 2/2   | - 3/3 | - 1/1 | - 2/2 | - 2/2 |
|                                 | Ovary            | - 1/1   | + 1/1   | nd      | nd    | nd    | + 3/3   | + 1/2   | - 2/2 | - 1/1 | - 2/2 | - 2/2 |
|                                 | Testis           | - 1/1   | + 1/1   | nd      | nd    | nd    | + 1/1   | nd      | -1/1  | - 1/1 | - 2/2 | - 2/2 |
|                                 | Lymph nodes      | nd      | nd      | nd      | nd    | nd    | + 3/3   | + 1/1   | - 3/3 | - 1/1 | - 2/2 | - 2/2 |

|                                 | <b>Genotype</b>  | ATXiCre | ATXiCre | ATX   | ATX   | iCre  | iCre  | ATXiCre* | ATXiCre* | ATX: homozygous <i>Enpp2</i> <sup>fl/fl</sup> ; iCre: heterozygous R26CreER <sup>T2</sup> ;<br><br>IP: intraperitoneal; PO: oral; Tmx: Tamoxifen;<br><br>+ denotes detection of complete removal of floxed exons along with the neo cassette, as described previously (PMID:20079728)<br><br>nd: not determined<br><br>+1/2: denotes recombination in 1 out of 2 mice tested.<br><br>*denotes separate housing of mice receiving Tmx |
|---------------------------------|------------------|---------|---------|-------|-------|-------|-------|----------|----------|--------------------------------------------------------------------------------------------------------------------------------------------------------------------------------------------------------------------------------------------------------------------------------------------------------------------------------------------------------------------------------------------------------------------------------------|
|                                 | <b>Treatment</b> | Tmx     | Oil     | Tmx   | Oil   | Tmx   | Oil   | Tmx      | Oil      |                                                                                                                                                                                                                                                                                                                                                                                                                                      |
|                                 | <b>mg/Kg</b>     | 180     | -       | 180   | -     | 180   | -     | 180      | -        |                                                                                                                                                                                                                                                                                                                                                                                                                                      |
|                                 | <b>Route</b>     | PO      | PO      | PO    | PO    | PO    | PO    | PO       | PO       |                                                                                                                                                                                                                                                                                                                                                                                                                                      |
|                                 | <b>Days</b>      | 6       | 6       | 6     | 6     | 6     | 6     | 6        | 6        |                                                                                                                                                                                                                                                                                                                                                                                                                                      |
| <b>Recombination in tissues</b> | Brain            | + 9/9   | + 2/2   | - 4/4 | - 3/3 | - 5/5 | - 3/3 | +2/2     | -2/2     |                                                                                                                                                                                                                                                                                                                                                                                                                                      |
|                                 | Heart            | + 8/8   | + 2/2   | - 3/3 | - 2/2 | - 5/5 | - 3/3 | nd       | nd       |                                                                                                                                                                                                                                                                                                                                                                                                                                      |
|                                 | Lung             | + 9/9   | + 2/2   | - 3/3 | - 3/3 | - 5/5 | - 3/3 | +1/1     | -2/2     |                                                                                                                                                                                                                                                                                                                                                                                                                                      |
|                                 | Gut              | + 11/11 | + 2/2   | - 4/4 | - 3/3 | - 5/5 | - 3/3 | +1/1     | -2/2     |                                                                                                                                                                                                                                                                                                                                                                                                                                      |
|                                 | Spleen           | + 11/11 | + 2/2   | - 4/4 | - 3/3 | - 4/4 | - 3/3 | nd       | nd       |                                                                                                                                                                                                                                                                                                                                                                                                                                      |
|                                 | Stomach          | + 8/8   | + 2/2   | - 3/3 | - 3/3 | - 5/5 | - 3/3 | nd       | nd       |                                                                                                                                                                                                                                                                                                                                                                                                                                      |
|                                 | Spinal cord      | + 9/9   | + 2/2   | - 4/4 | - 3/3 | - 5/5 | - 3/3 | nd       | nd       |                                                                                                                                                                                                                                                                                                                                                                                                                                      |
|                                 | Kidney           | + 9/9   | + 2/2   | - 4/4 | - 3/3 | - 5/5 | - 3/3 | nd       | nd       |                                                                                                                                                                                                                                                                                                                                                                                                                                      |
|                                 | Liver            | + 11/11 | + 2/2   | - 4/4 | - 3/3 | - 6/6 | - 3/3 | +1/1     | -2/2     |                                                                                                                                                                                                                                                                                                                                                                                                                                      |
|                                 | Ovary            | +1/1    | nd      | - 2/2 | - 2/2 | - 1/1 | - 1/1 | nd       | nd       |                                                                                                                                                                                                                                                                                                                                                                                                                                      |
|                                 | Testis           | + 6/6   | + 2/2   | - 1/1 | - 1/1 | - 1/1 | - 1/1 | nd       | nd       |                                                                                                                                                                                                                                                                                                                                                                                                                                      |
|                                 | Lymph nodes      | + 10/10 | + 2/2   | - 4/4 | - 3/3 | - 5/5 | - 3/3 | nd       | nd       |                                                                                                                                                                                                                                                                                                                                                                                                                                      |
